# Supplementary material for: How people talk about rejection: Linguistic profiles of self-compassion, reappraisal, and control writing conditions
Source: Research Square preprint supplement (doi:10.21203/rs.3.rs-6857482/v1), 2025-08-05
Supplement: Supplementary file 1 [file 032153128a365eadac8361a6.docx]

How people talk about rejection: Linguistic profiles of self-compassion, reappraisal, and control writing conditions

Funding: MASKED for BLINDED REVIEW

**Supplementary Material**

**Self-compassion Writing Prompt**

Please complete this brief writing exercise and follow the instructions as closely as possible.

Go back to the time and place of the experience and relive the situation as if it were happening to you all over again.

In the space below, please write about what thoughts and emotions are coming up for you right now regardingthe time you felt rejected. As you write and notice your feelings, see if you can validate your experience with an attitude of acceptance and non-judgment.

(For example, “*I feel sad that my partner broke up with me. They meant so much to me and I thought they felt the same way. I also feel angry because they hurt my feelings…*”)

*Remember – your responses are completely anonymous, and your writing is confidential. Don’t worry about spelling, sentence structure, or grammar.

[WRITE]

In the space below, please write about how other people may share similar feelings when encountering rejection**.**

(For example, “*I am not the only one who struggles with feeling rejected. Most people have a difficult time facing rejection. It’s not just me…*”)

[WRITE]

In the space below, please write any words of support, encouragement and kindness to yourself that would be helpful to hear right now.

(For example, “*You’re doing the best you can. I’m so sorry you’re struggling with this. It’s going to be okay. I will help you and support you to get through this…*”)

[WRITE]

Please take some time to read what you wrote and see if anything particularly stands out for you

**Detached Reappraisal Writing Prompt**

Please complete this brief writing exercise and follow the instructions as closely as possible.

Go back to the time and place of the experience, take a few steps back and move away from your experience, as if you were a fly on the wall, watch the experience unfold as if it were happening all over again, but from a distance.

In the space below, please write about what exactly is occurring in this situation when you felt rejected. Try to be as descriptive, and unemotional as possible.

(For example, “*I was broken up with. I wanted to stay together but he didn’t want to because…”*)

*Remember – your responses are completely anonymous, and your writing is confidential. Don’t worry about spelling, sentence structure, or grammar.

[WRITE]

In the space below, please write about who is involved in the event you just recalled. Please described the people involved with as much detail as possible, while also remaining detached.

(For example, “*Myself and my ex-boyfriend are no longer together. I am a sophomore in college from Arizona. He is a senior in college from Utah”*).

[WRITE]

In the space below, please write any words that have been spoken in the situation. Include what you have said to yourself, what others have said to you, or what you have said to other people. Please use as much detail as possible as if it were being told from an outside perspective.

(For example, “*I told him that I did not want to break up and that maybe we could work something out. He told me that I should move on and that I would be better without him…*”)

[WRITE]

Please take some time to read what you wrote and see if anything particularly stands out for you.
